# Supplementary material
Source: PubMed Central journal article supplement (PMC3137230)
Supplement: cb200057a_si_001.pdf [file cb200057a_si_001.pdf]

# Stereochemical Basis for Engineered Pyrrolysyl-tRNA Synthetase and the Efficient *In Vivo* Incorporation of Structurally Divergent Non-Native Amino Acids

Jeffrey K. Takimoto<sup>1,†</sup>, Nikki Dellas<sup>1,†</sup>, Joseph P. Noel<sup>1,2</sup> & Lei Wang<sup>1,\*</sup>

<sup>1</sup>The Jack H. Skirball Center for Chemical Biology & Proteomics, <sup>2</sup> Howard Hughes Medical Institute, The Salk Institute for Biological Studies, 10010 North Torrey Pines Road, La Jolla, California, 92037, U.S.A.

## Supporting Information

### DNA sequences:

#### Sperm whale myoglobin (Myo4TAG)

```
atgactagtgttctgtaggaaggtgaatggcagctggttctgcatggttgggctaagttgaagctgacg
tcgctggatcatgggcaggacatcttgattcgactgttcaaactctcatccggaaactctggaaaaattcga
tcggttcaaacatctgaaaactgaagctgaaatgaaagcttctgaagatctgaaaaacatgggtgttacc
gtgtaactgcccaggtgctatccttaagaaaaaggcatcatgaagctgagctcaaaccgcttgac
aatcgcatgctactaaacataagatcccgatcaaaactggaattcatctctgaagcgatcatccatgt
tctgcattctagacatccaggtgacttcgggtgctgacgctcaggggtgctatgaacaaagctctcgagctg
ttccgtaaagatatcgctgctaagtaacaaagaactgggttaccagggatctcatcaccatcaccatcact
aa
```

#### GFP (182TAG)

```
atgactagtgtgagcaagggcgaggagctgttcaccgggggtggtgcccatcctggtcgagctggacggcg
acgtaaacggccacaagttcagcgtgtccggcgagggcgagggcgatgccacctacggcaagctgacct
gaagttcatctgcaccaccggcaagctgcccgtgccctggcccacctcgtgaccacctgacctacggc
gtgcagtgcttcagccgctaccccgaccacatgaagcagcagcacttcttcaagtccgccatgccgaag
gctacgtccaggagcgcaccatcttcttcaaggacgacggcaactacaagaccgcgccgaggtgaagtt
cgagggcgacaccctggtgaaccgcatcgagctgaagggcatcgacttcaaggaggacggcaacatcctg
gggcacaagctggagtacaactacaacagccacaacgtctatatcatggccgacaagcagaagaacggca
tcaaggccaacttcaagatccgccacaacatcgaggacggcagcgtgcagctcgccgaccactagcagca
gaacacccccatcggcgacggccccgtgctgctgcccgacaaccactacctgagcaccctcagcctg
agcaagacccccaacgagaagcgcgatcacatggctcctgctggagttcgtgaccgcccgggatcactc
tcggcatggacgagctgtacaagagatctcatcaccatcaccatcactaa
```

#### MmPy1RS (Y384F)

```
atggataaaaagcctctgaacactctgatttctgacccggctctgtggatgtcccgcaccggcaccatcc
acaaaatcaaacaccatgaagtttagcgttccaaaatctacattgaaatggcttgccggcgatcacctggt
tgtcaacaactccggttcttctcgtaccgctcgcgactgcgccaccacaaatctcgcaaaacctgcaaa
cgttgccgtgttagcgtgagggacctgaacaaattcctgaccaaagctaaccgaggtcagacctccgtaa
aagtgaaaggtagtaagcgtccgaccgctactaaaaaggctatgccaaaaagcgtggcccgtgcccggaa
acctctggaaaaacaccgagggcggtcaggtcaaccatccgggttctaaatcttctccggcgatcccagtg
tccaccaagaatctgttccgtaccagcaagcgtgtctaccagcatttagcagcatttctaccgggtgcta
ccgcttctgcgctggtaaaaggtaacactaacccgattactagcatgtctgcaccgggtacaggcaagcgc
cccagctctgactaaatcccagacggaccgtctggaggtgctgctgaaccacaaaggatgaaatctctctg
aacagcggcaagccttccgtagctggaagcgcagctgctgctcgtcgtaaaaaggatctgcaacaga
tctacgctgaggaacgcgagaactatctgggtaagctggagcgcgaaattactcgcttcttctcgtggatcg
```

cggtttcctggagatcaaactctccgattctgattccgctggaatacattgaacgatggggcatcgataat  
gataccgaactgtctaaacagatcttccgtgtggataaaaacttctgtctgcgtccgatgctggccccga  
acctgtacaactatctgcgtaaaactggaccgtgccctgccggaccgatcaaaatcttcgagatcgggcc  
ttgctaccgtaagagtcgacggttaagagcaccctggaagaattcaccatgctgaacttctgccagatg  
ggtagcgggttgacgcgtgaaaacctggaatccattatcaccgacttctgaatcacctgggtatcgatt  
tcaaaattgttggtgacagctgtatggtgtttggcgatacgcctggatggtatgcacggcgatctggagct  
gtcttccgcagtagtgggccaatcccgcctggatcgtgagtggggtatcgacaaaccttggatcggtgcg  
ggttttggctctggagcgtctgctgaaagtaaaacacgacttcaagaacatcaaacgtgctgcacgttccg  
agtcctattacaatggtatttctactaacctgtaa

**MmPylT** (*M. mazei* tRNA<sup>Pyl</sup><sub>CUA</sub>)

ggaaacctgatcatgtagatcgaatggactctaaatccgttcagccgggttagattcccgggggttccgc  
ca

**MmOmeRS**

atggataaaaagcctctgaacactctgatttctgcgaccgggtctgtggatgtcccgcaccggcaccatcc  
acaaaatcaaacaccatgaagttagccgttccaaaatctacattgaaatggcttgcggcgatcacctggt  
tgtcaacaactcccgttcttctcgtaccgctcgcgcaactgcgccaccacaaatcgcaaaacctgcaaa  
cgttgcgctgtagcgatgaggacctgaacaaattcctgaccaaagctaacgaggatcagacctccgtaa  
aagtgaaggtagtaagcgtccgaccgtaactaaaaaggctatgccaaaagcgtggcccggtgccccgaa  
acctctggaaaacaccgagggcggtcaggctcaaccatccgggttctaaatcttctccggcgatcccagtg  
tccaccaagaatctgtttccgtaccagcaagcgtgtctaccagcatttagcagcatttctaccggtgcta  
ccgcttctgcgctggtaaaaggtaacactaaccgattactagcatgtctgcaccggtagcaggcaagcgc  
cccagctctgactaaatcccagacggaccgtctggaggtgctgctgaaccacaaaggatgaaatctctctg  
aacagcggcaagccttccgtgagctggaaagcgagctgctgtctcgtcgtaaaaaggatctgcaacaga  
tctacgctgaggaacgcgagaactatctgggtaagctggagcgcgaaattactcgttcttctggtggatcg  
cggtttctcctggagatcaaactctccgattctgattccgctggaatacattgaacgatggggcatcgataat  
gataccgaactgtctaaacagatcttccgtgtggataaaaacttctgtctgcgtccgatgctgactccga  
acctgtacaactatcttctgtaaaactggaccgtgccctgccggaccgatcaaaatcttcgagatcgggtcc  
ttgctaccgtaagagtcgacggttaagagcaccctggaagaattcaccatgctggttttctggcagatg  
ggtagcgggttgacgcgtgaaaacctggaatccattatcaccgacttctgaatcacctgggtatcgatt  
tcaaaattgttggtgacagctgtatggtgtttggcgatacgcctggatggtatgcacggcgatctggagct  
gtcttccgcattggtgggccaatcccgcctggatcgtgagtggggtatcgacaaaccttggatcggtgcg  
ggttttggctctggagcgtctgctgaaagtaaaacacgacttcaagaacatcaaacgtgctgcacgttccg  
agtcctattacaatggtatttctactaacctgtaa

**Primers for cloning:**

**GFP182TAG**

DJ654 5' -GCA GAT CTC TTG TAC AGC TCG TCC ATG CC- 3'  
DJ655 5' -ATG ACT AGT GTG AGC AAG GGC GAG G- 3'

**Myo4TAG**

JT762 5' -GAG ACT AGT GTT CTG TAG GAA GGT GAA TGG CAG CTG GTT  
C- 3'  
JT763 5' -GAG GGA TCC CTG GTA ACC CAG TTC TTT GTA CTT AGC  
AG- 3'

**pBK5-MmPylRS**

JT552 5' -GTG TAC ACA TAT GGA TAA AAA GCC TCT GA- 3'  
JT632 5' -GCC GTG TTA GCG ATG AGG ACC TGA ACA AAT TCC TGA  
CC- 3'

JT633 5' -GGT CAG GAA TTT GTT CAG GTC CTC ATC GCT AAC ACG  
GC- 3'  
JT634 5' -GAA ACT GCA GCC ACC CGC CTG GTT ACA GGT TAG TAG  
AAA TAC CAT TGT AAT AGG- 3'

**Library construction (A302, L309, N346, C348, V401, and W417)**

JT552 5' -GTG TAC ACA TAT GGA TAA AAA GCC TCT GA- 3'  
JT620 5' -CAG GGC ACG GTC CAG TTT ACG MNN ATA GTT GTA CAG  
GTT CGG MNN CAG CAT C- 3'  
JT621 5' -AAA CTG GAC CGT GCC CTG- 3'  
JT624 5' -GAT CCA GCG GGA TTG GGC CCA CMN NTG CGG AAG- 3'  
JT634 5' -GAA ACT GCA GCC ACC CGC CTG GTT ACA GGT TAG TAG  
AAA TAC CAT TGT AAT AGG- 3'  
JT625 5' -GGC CCA ATC CCG CTG GAT CGT GAG TGG GGT ATC GAC  
AAA CCT NNK ATC GGT GC- 3'

**pMPcua-OmeRS**

JT768 5' -CAC AGA TCT CCG GAA ACC TGA TCA TGT AGA TCG AAT  
GGA C- 3'  
JT769 5' -GAG AAG CTT CAA AAA AAG GAC CCG GAA ACC CCG GGA  
ATC TAA C-3'

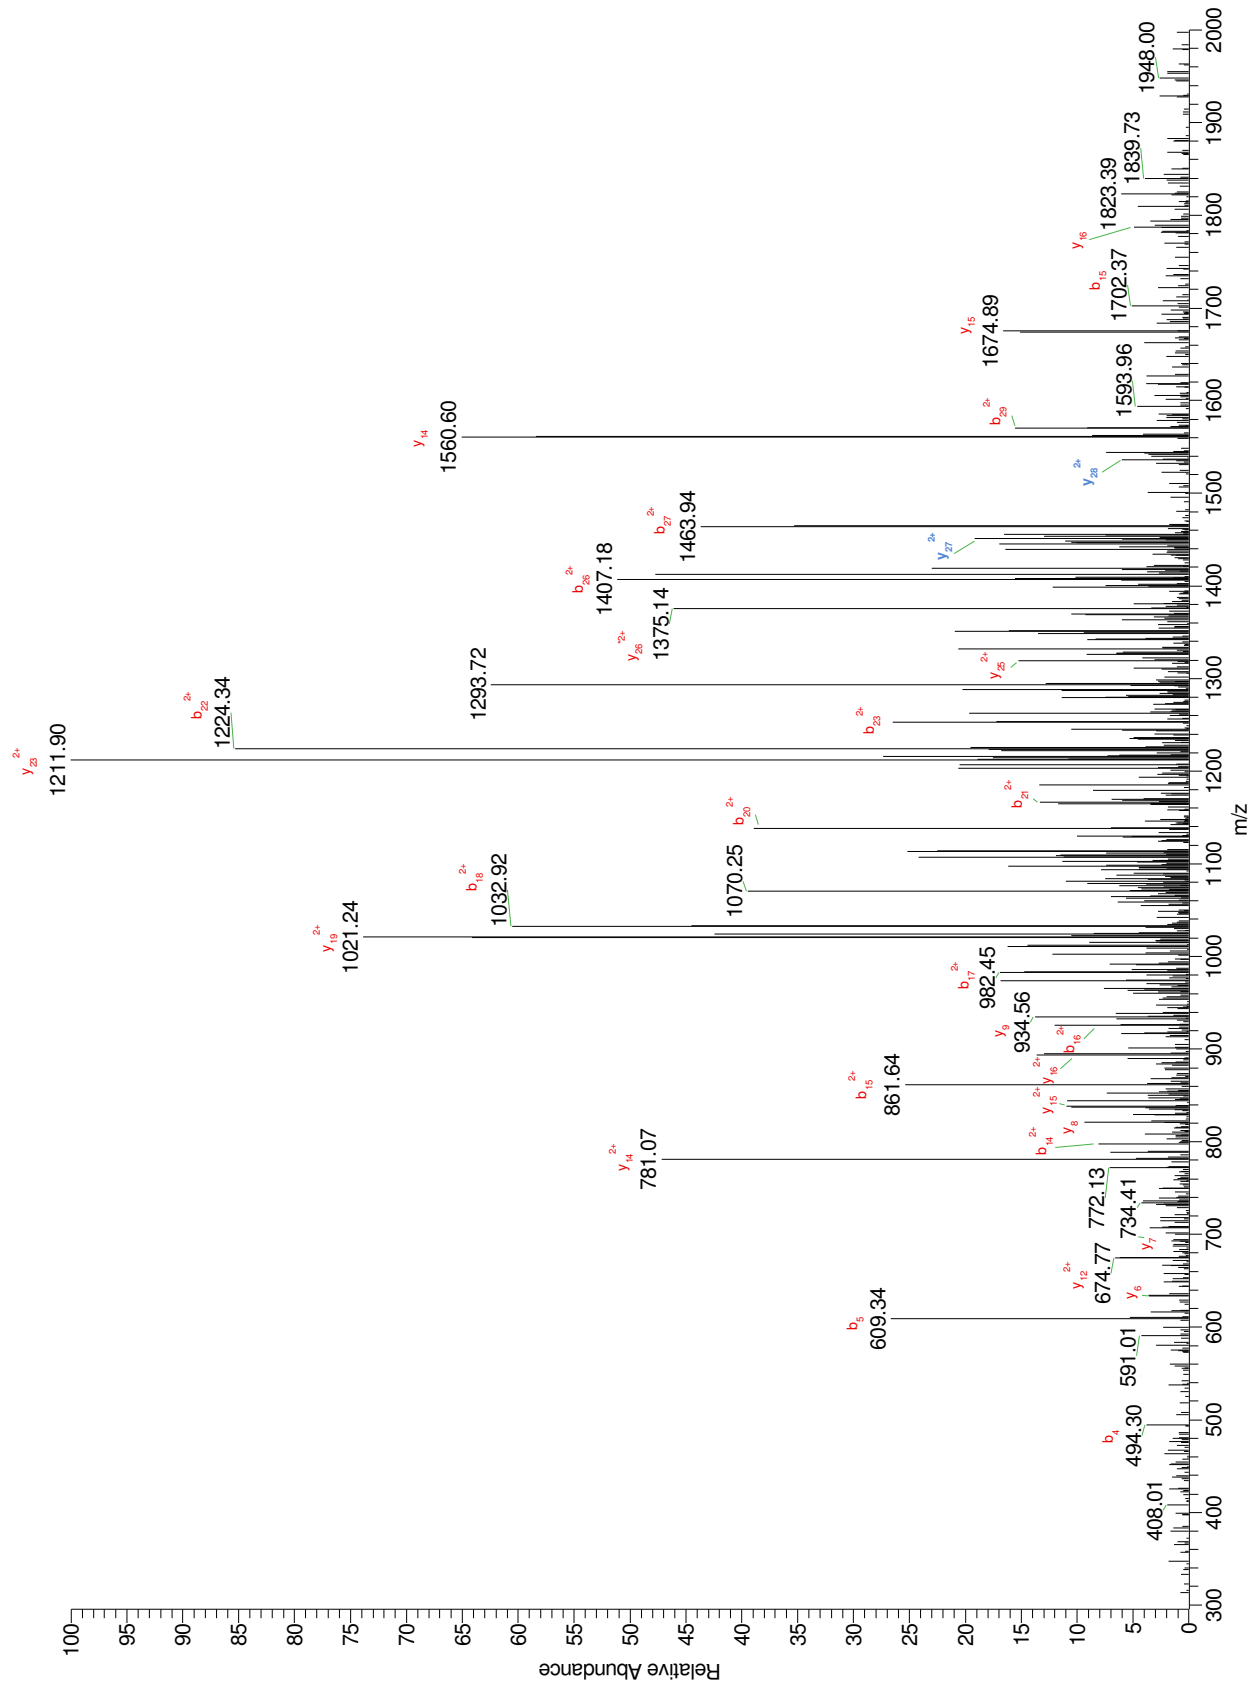

**Supplementary Figure 1.** Tandem mass spectrum of peptide  $^+H_3N$ -HNIEDGSVQLADHXQQ NTPIGDGPVLLPDNHYLSTQSALS $K$ -CO $_2$ H. X represents the UAG encoded site at position 182 of GFP. The sequence of the peptide containing Ome at position X was unambiguously assigned from the annotated b and y ion series.

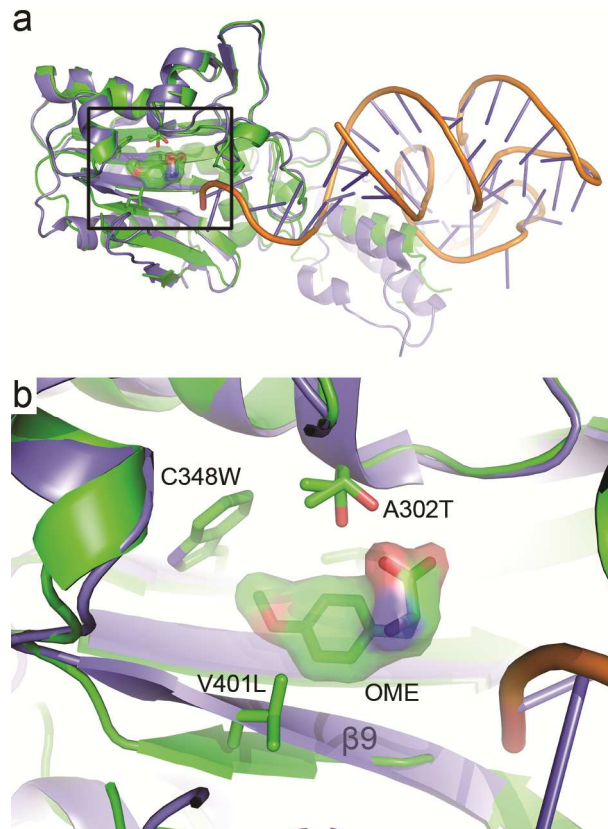

**Supplementary Figure 2.** Superposition of *M. mazei* OmeRS complexed with Ome and AMP-PNP to *D. hafniense* PylRS complexed with tRNA (PDB ID 2ZNI). **a)** global view of the PylRS crystal structure (tRNA colored orange and PylRS colored purple) superposed to the OmeRS crystal structure (colored green). **b)** close-up view of the active sites for both synthetases. The Ome substrate and all four mutated residues are displayed for the OmeRS structure.
